# Supplementary material for: Atomically-precise Au22(Lys-Cys-Lys)16 nanoclusters for radiation sensitization
Source: Springer Nature journal article supplement (doi:10.1186/s12951-025-03256-7), 2025-03-07
Supplement: MOESM1 [file 12951_2025_3256_MOESM1_ESM.pdf]

# Atomically-Precise Au<sub>22</sub>(Lys-Cys-Lys)<sub>16</sub> Nanoclusters for Radiation Sensitization

*Elham Zeinizade,<sup>a,b</sup> Goonay Yousefalizideh,<sup>c</sup> Parimah Aminfar,<sup>c</sup> Matthew Horn,<sup>a</sup> Lili Ding,<sup>a</sup> Layla Pires,<sup>a</sup> Alina Jaglanian,<sup>a</sup> Lucie Malbeteau,<sup>a</sup> Kristen Harrington,<sup>c</sup> Carla Calçada,<sup>a</sup> Mohamad Dukuray,<sup>a</sup> Brian C. Wilson,<sup>a,b</sup> Marianne Koritzinsky,<sup>a,b,d,e</sup> Juan Chen,<sup>a\*</sup> Kevin G. Stamplecoskie,<sup>c\*</sup> Gang Zheng<sup>a,b,e\*</sup>*

<sup>a</sup> Princess Margaret Cancer Centre, University Health Network, Toronto, Ontario, Canada, M5G 1L7

<sup>b</sup> Department of Medical Biophysics, University of Toronto, Toronto, Ontario, Canada, M5G 1L7

<sup>c</sup> Department of Chemistry, Queen's University, Kingston, Ontario K7L 3N6, Canada

<sup>d</sup> Department of Radiation Oncology, University of Toronto, ON, Canada

<sup>e</sup> Institute of Medical Science, University of Toronto, Toronto, Ontario, M5G 1L7

\*Corresponding Author: [juan.chen@uhn.ca](mailto:juan.chen@uhn.ca), [kevin.stamplecoskie@queensu.ca](mailto:kevin.stamplecoskie@queensu.ca), [gang.zheng@uhn.ca](mailto:gang.zheng@uhn.ca).

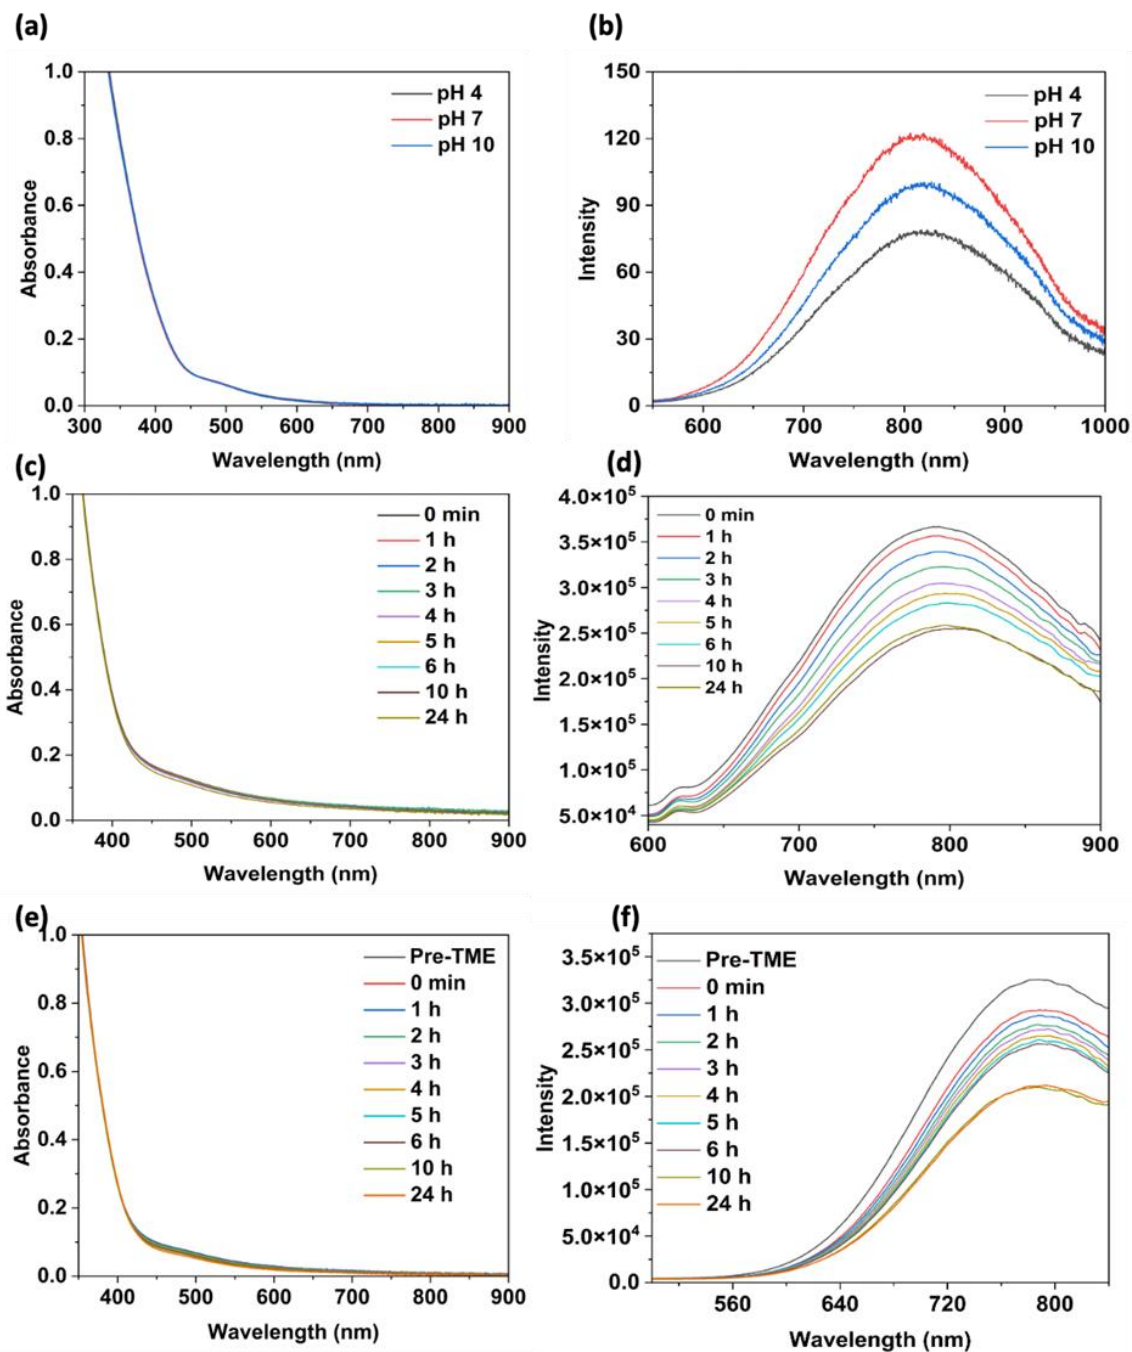

**Figure S1.** (a) absorbance and (b) emission spectra of  $\text{Au}_{22}(\text{Lys-Cys-Lys})_{16}$  nanoclusters at various pH. (c) absorbance and (d) emission spectra monitored for 24 h in 50% FBS in PBS. (e,f) corresponding spectra in TME conditions.

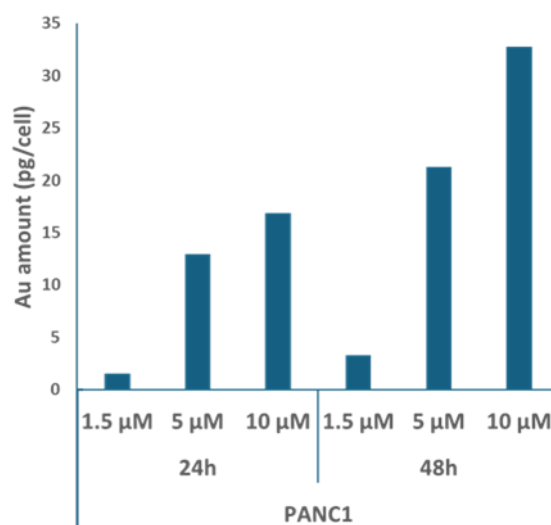

**Figure S2.** Nanocluster intracellular uptake (gold content measured by ICP-MS) in the PANC-1 cells, varying the incubation time and concentration.

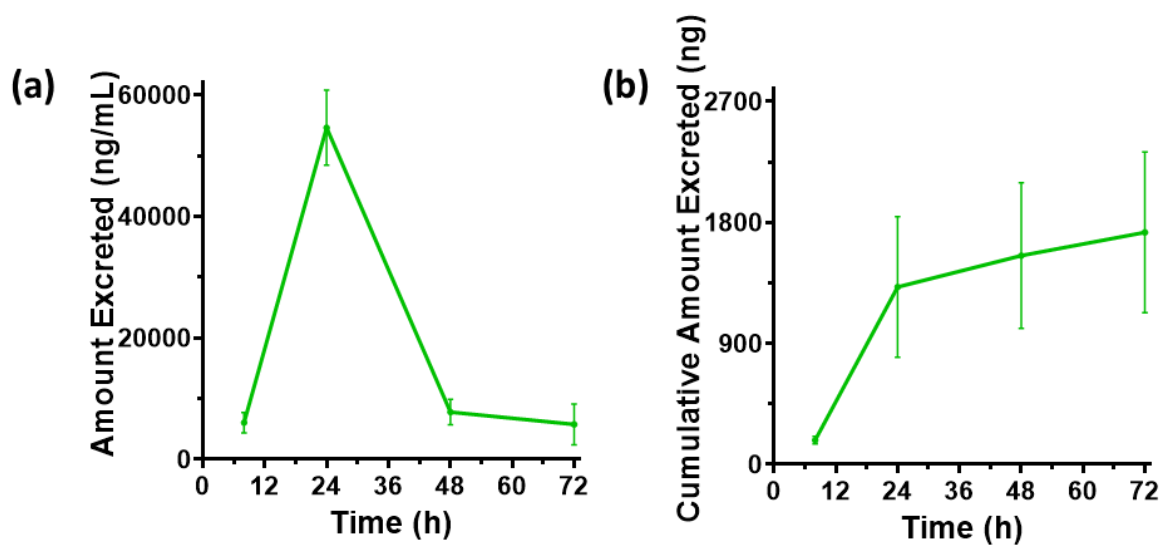

**Figure S3.** Renal clearance of AuNCs following 10 mg/kg i.v. injection: Means  $\pm$  1 s.d., N=5 mice **(a)** gold concentration in excreted urine at different time period, and **(b)** total gold in the collected urine.
